# Supplementary material
Source: PubMed Central journal article supplement (PMC3212044)
Supplement: NIHMS332704-supplement-SI.pdf [file NIHMS332704-supplement-SI.pdf]

## Multilayer coating of gold nanorods for combined stability and biocompatibility

Xiaoge Hu and Xiaohu Gao\*

University of Washington, Department of Bioengineering, William H. Foege Building N530M,

Seattle, WA 98195, USA. Email: [xgao@u.washington.edu](mailto:xgao@u.washington.edu)

Supplementary Materials

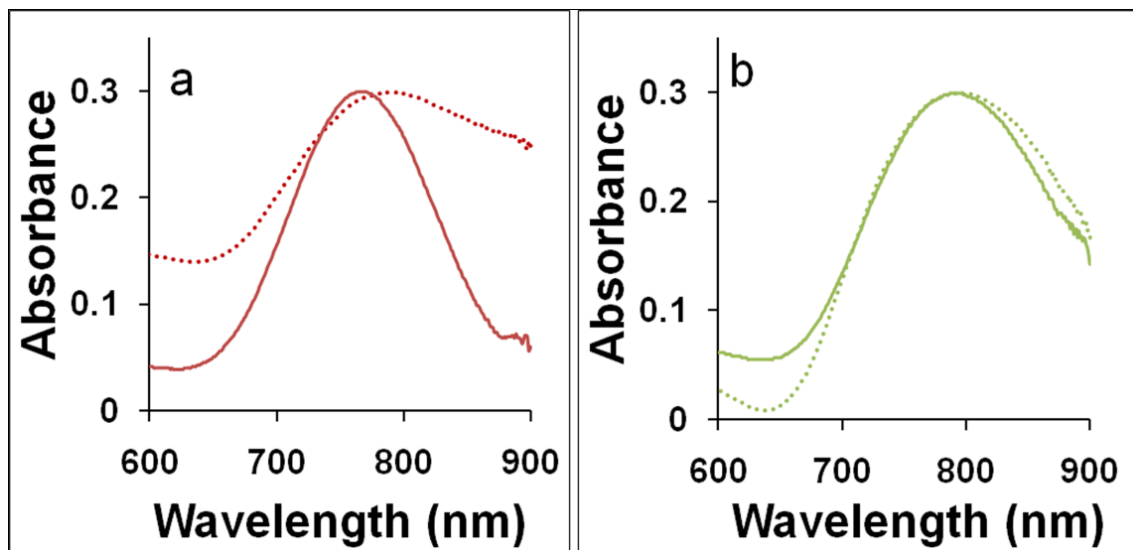

**Figure S1:** Absorption spectra of GNR@SH-PEG (a) and GNR@SiO<sub>2</sub>@PE-PEG (b) in aqueous solution (solid line) and in cells (dashed lines). The spectrum of GNR@SH-PEG inside cells is broadened and redshifted by ~20 nm, whereas that of GNR@SiO<sub>2</sub>@PE-PEG shows negligible changes before and after cell uptake.
